# Supplementary material for: Dual-role epitope on SARS-CoV-2 spike enhances and neutralizes viral entry across different variants
Source: PubMed Central journal article supplement (PMC11407660; doi:10.1371/journal.ppat.1012493), 2024-09-05

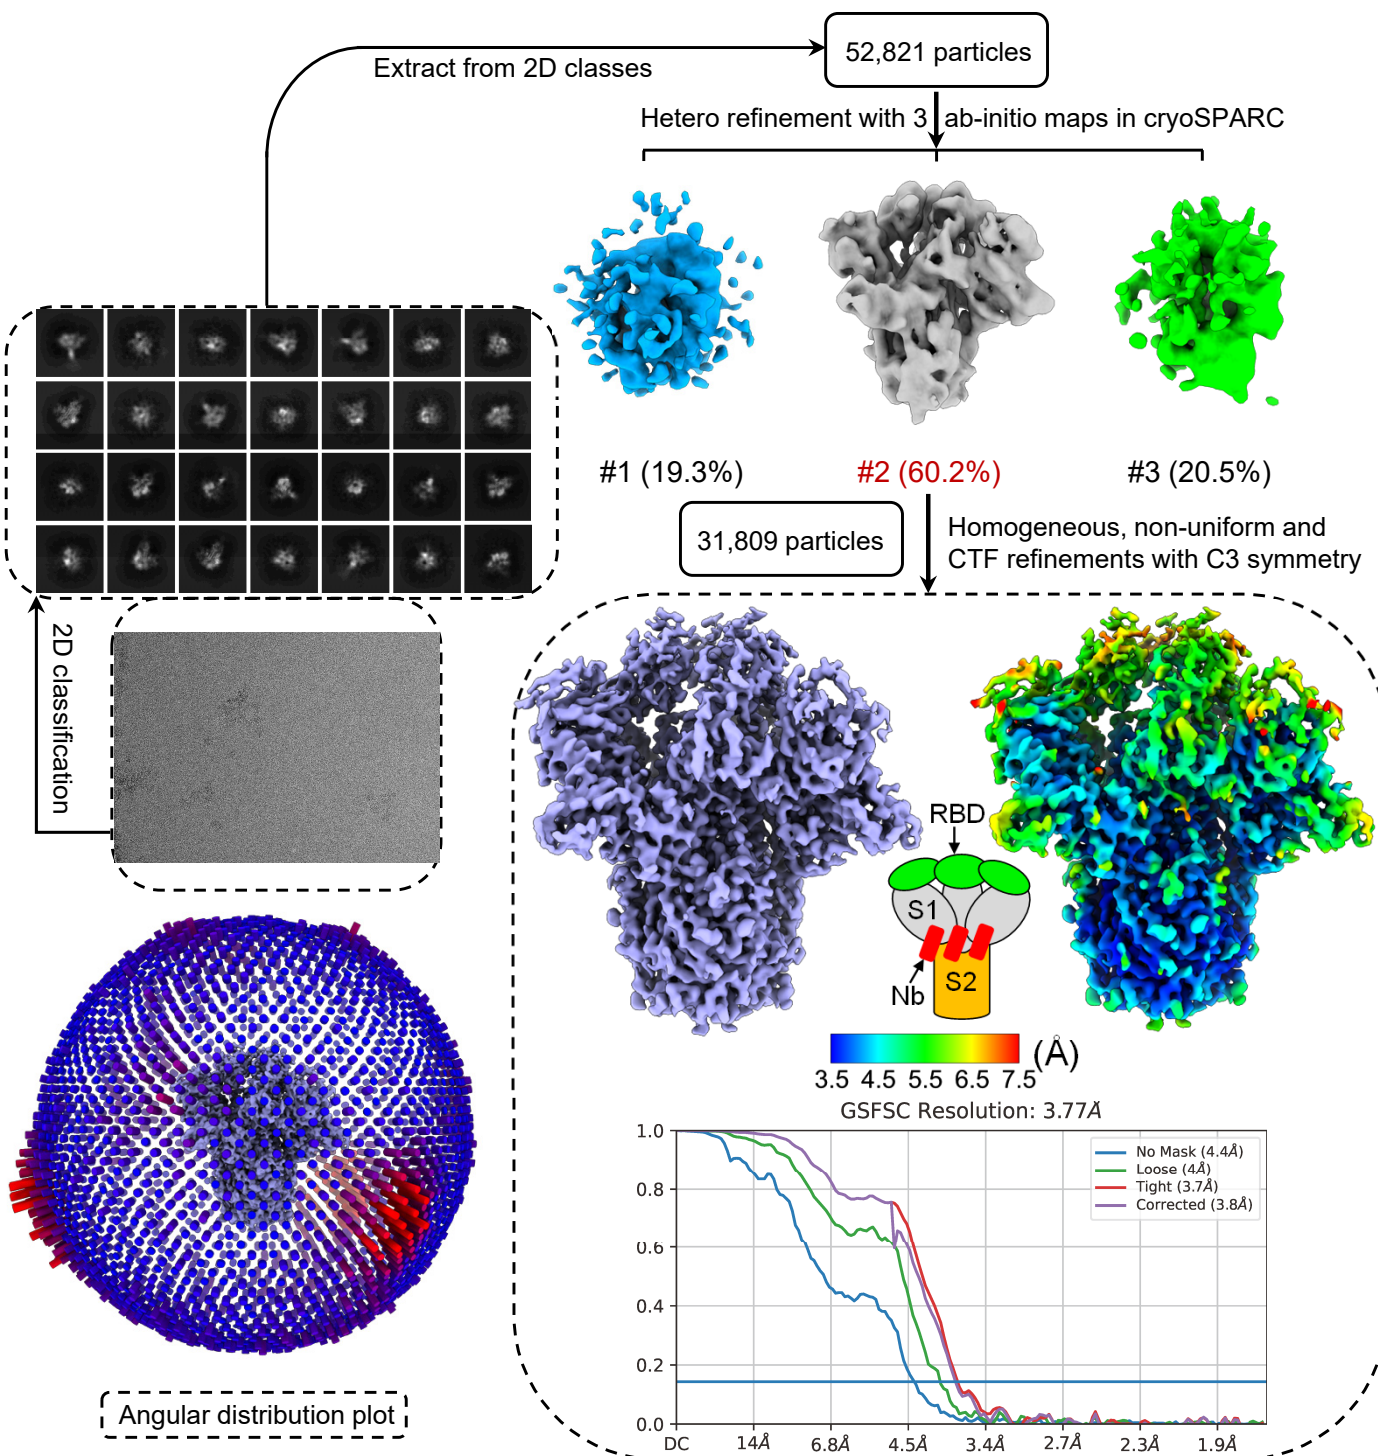

Supplement: ppat.1012493.s001.pdf [file ppat.1012493.s001.pdf]
