# Supplementary material for: Dual-role epitope on SARS-CoV-2 spike enhances and neutralizes viral entry across different variants
Source: PubMed Central journal article supplement (PMC11407660; doi:10.1371/journal.ppat.1012493), 2024-09-05
Supplement: ppat.1012493.s005.pdf [file ppat.1012493.s005.pdf]

Extract from 2D classes

100,775 particles

Hetero refinement with 3 ab-initio maps in cryoSPARC

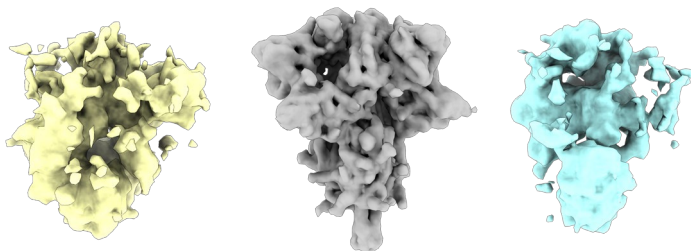

#1 (8.6%)

#2 (81.1%)

#3 (10.3%)

81,718 particles

Homogeneous, non-uniform and CTF refinements with C3 symmetry

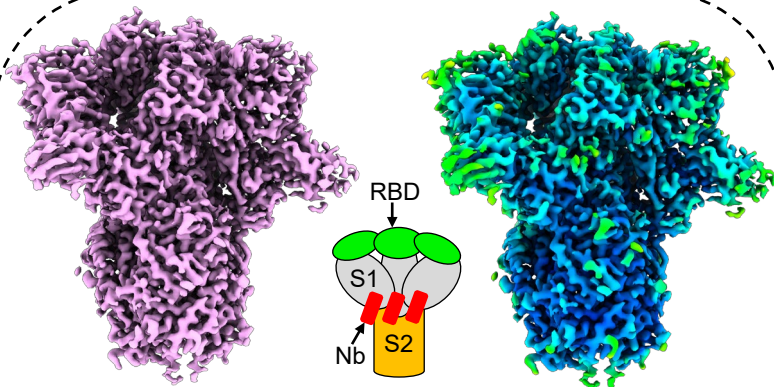

3.0 3.6 4.2 4.8 5.4 (Å)

GSFSC Resolution: 3.49Å

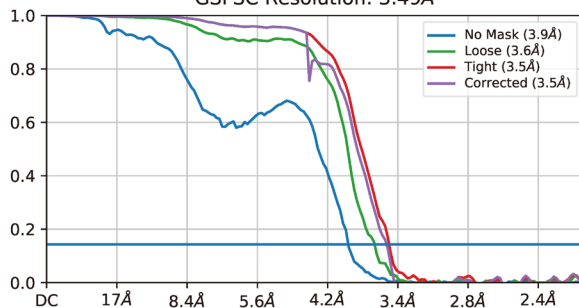

2D classification

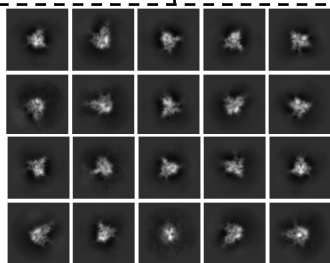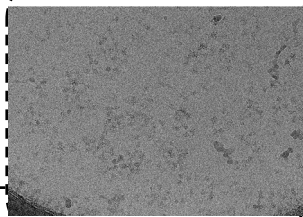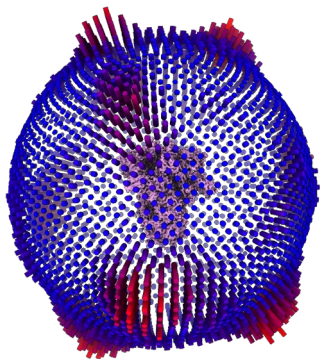

Angular distribution plot
