# Supplementary material for: Dual-role epitope on SARS-CoV-2 spike enhances and neutralizes viral entry across different variants
Source: PubMed Central journal article supplement (PMC11407660; doi:10.1371/journal.ppat.1012493), 2024-09-05
Supplement: ppat.1012493.s011.pdf [file ppat.1012493.s011.pdf]

**Table S1: Cryo-EM data collection, refinement and validation statistics of the prototypic spike/Nanosota-5, prototypic spike/Nanosota-6, and XBB.1.5 spike/Nanosota-5 complexes.**

|                                                     | Prototypic spike<br>/Nanosota-5<br>(EMD-29798)<br>(PDB 8G76) | Prototypic spike<br>/Nanosota-6<br>(EMD-29799)<br>(PDB 8G77) | XBB.1.5 spike<br>/Nanosota-5<br>(EMD-42218)<br>(PDB 8UG9) |
|-----------------------------------------------------|--------------------------------------------------------------|--------------------------------------------------------------|-----------------------------------------------------------|
| <b>Data collection and processing</b>               |                                                              |                                                              |                                                           |
| Magnification                                       | 130,000                                                      | 130,000                                                      | 81,000                                                    |
| Voltage (kV)                                        | 300                                                          | 300                                                          | 300                                                       |
| Electron exposure (e <sup>-</sup> /Å <sup>2</sup> ) | 40.00                                                        | 40.00                                                        | 50.00                                                     |
| Defocus range (μm)                                  | -0.8 ~ -2.4                                                  | -0.8 ~ -2.4                                                  | -1.0 ~ -2.0                                               |
| Pixel size (Å)                                      | 0.664                                                        | 0.664                                                        | 1.1                                                       |
| Symmetry imposed                                    | C3                                                           | C3                                                           | C3                                                        |
| Initial particle images (no.)                       | 52,821                                                       | 234,682                                                      | 100,775                                                   |
| Final particle images (no.)                         | 31,809                                                       | 189,562                                                      | 81,718                                                    |
| Map resolution (Å)                                  | 3.8                                                          | 2.8                                                          | 3.49                                                      |
| FSC threshold                                       | 0.143                                                        | 0.143                                                        | 0.143                                                     |
| Map resolution range (Å)                            | 3.5-7.5                                                      | 2.6-3.8                                                      | 3.0-5.4                                                   |
| <b>Refinement</b>                                   |                                                              |                                                              |                                                           |
| Initial model used (PDB code)                       | 7TGY                                                         | 7TGY                                                         | 8IOS                                                      |
| Model resolution (Å)                                | 4.0                                                          | 3.0                                                          | 3.6                                                       |
| FSC threshold                                       | 0.5                                                          | 0.5                                                          | 0.5                                                       |
| Model resolution range (Å)                          | 42.5-3.6                                                     | 54.2-2.7                                                     | 44.5-3.6                                                  |
| Map sharpening <i>B</i> factor (Å <sup>2</sup> )    | -124.9                                                       | -99.8                                                        | -106.9                                                    |
| Model composition                                   |                                                              |                                                              |                                                           |
| Non-hydrogen atoms                                  | 28572                                                        | 28945                                                        | 28386                                                     |
| Protein residues                                    | 3566                                                         | 3608                                                         | 3531                                                      |
| Ligands                                             | 53                                                           | 61                                                           | 57                                                        |
| <i>B</i> factors (Å <sup>2</sup> )                  |                                                              |                                                              |                                                           |
| Protein                                             | 234.87                                                       | 28.98                                                        | 32.11                                                     |
| Nucleotide                                          |                                                              |                                                              |                                                           |
| Ligand                                              | 234.03                                                       | 43.62                                                        | 62.73                                                     |
| R.m.s. deviations                                   |                                                              |                                                              |                                                           |
| Bond lengths (Å)                                    | 0.004                                                        | 0.005                                                        | 0.003                                                     |
| Bond angles (°)                                     | 0.620                                                        | 0.828                                                        | 0.553                                                     |
| Validation                                          |                                                              |                                                              |                                                           |
| MolProbity score                                    | 1.94                                                         | 1.96                                                         | 1.57                                                      |
| Clashscore                                          | 12.65                                                        | 11.70                                                        | 5.59                                                      |
| Poor rotamers (%)                                   | 0.42                                                         | 1.28                                                         | 0.23                                                      |
| Ramachandran plot                                   |                                                              |                                                              |                                                           |
| Favored (%)                                         | 95.29                                                        | 95.77                                                        | 96.12                                                     |
| Allowed (%)                                         | 4.56                                                         | 4.09                                                         | 3.82                                                      |
| Disallowed (%)                                      | 0.14                                                         | 0.14                                                         | 0.06                                                      |
